# Supplementary material for: Quantitative and Qualitative Determination of Polyphenolic Compounds in Castanea sativa Leaves and Evaluation of Their Biological Activities
Source: MDPI journal article supplement (doi:10.3390/app14093859), 2024-04-30
Supplement: s1 [file s1]

Supplementary Material

# Quantitative and Qualitative Determination of Polyphenolic Compounds in *Castanea sativa* Leaves and Evaluation of Their Biological Activities

Natalia Żurek <sup>1</sup>, Agata Maria Pawłowska <sup>1</sup>, Karolina Pycia <sup>1</sup>, Leszek Potocki <sup>2</sup> and Ireneusz Tomasz Kapusta <sup>1,\*</sup>

<sup>1</sup> Department of Food Technology and Human Nutrition, College of Natural Sciences, University of Rzeszow, 4 Zelwerowicza St., 35-601 Rzeszow, Poland; nzurek@ur.edu.pl (N.Ż.); agpawlowska@ur.edu.pl (A.M.P.); kpycia@ur.edu.pl (K.P.)

<sup>2</sup> Department of Biotechnology, College of Natural Sciences, University of Rzeszow, 1 Pigonia St., 35-310 Rzeszow, Poland; lpotocki@ur.edu.pl

\* Correspondence: ikapusta@ur.edu.pl; Tel.: +48-17-785-5238

**Supplementary Table S1.** Correlation between all parameters assessed for the *C. sativa* leaf methanolic extract.

**Supplementary Figure S1.** UPLC chromatogram of *C. sativa* leaf methanolic extracts.

**Table S1.** Correlation between all parameters assessed for the *C. sativa* leaf methanolic extract.

[illegible]

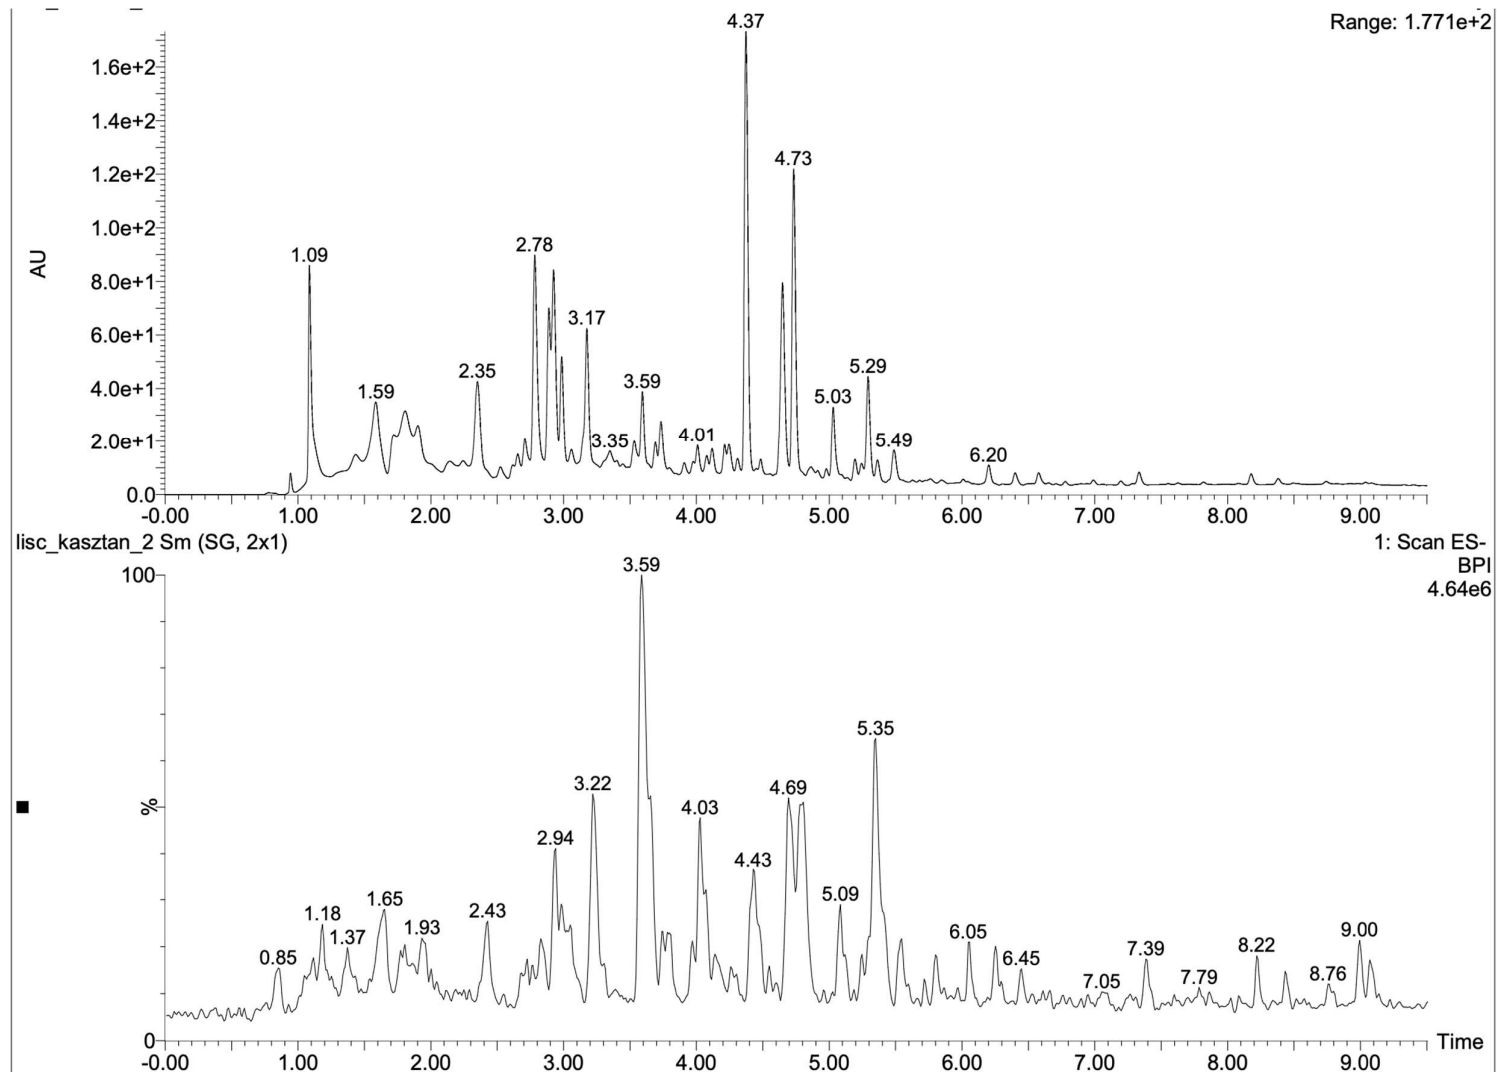

**Figure S1.** UPLC chromatogram of *C. sativa* leaf methanolic extracts (upper PDA, lower ESI-MS).
